# Supplementary material
Source: MDPI journal article supplement (https://www.mdpi.com/2227-9717/10/8/1659)
Supplement: s1 [file s1]

## **Supplementary information**

### **In-situ Synthesis of Zero-valent Iron Decorated Lignite Carbon for Heavy Metals Removals from Aqueous Solutions**

Hasara Samaraweera<sup>1,2</sup>, Samadhi Nawalage<sup>1</sup>, R.M Oshani Nayanathara<sup>3</sup>, Chathuri Peiris<sup>1</sup>,  
Tharindu N. Karunaratne<sup>3</sup>, Sameera R. Gunatilake<sup>2</sup>, Rooban V.K.G. Thirumalai<sup>4</sup>, Jilei Zhang<sup>3</sup>,  
Xuefeng Zhang<sup>3,\*</sup>, Todd Mlsna<sup>1,\*</sup>

<sup>1</sup> Department of Chemistry, Mississippi State University, Mississippi State, MS, USA

<sup>2</sup> College of Chemical Sciences, Institute of Chemistry Ceylon, Rajagiriya, CO, 10107, Sri Lanka

<sup>3</sup> Department of Sustainable Bioproducts, Mississippi State University, Starkville, Mississippi 39762, USA

<sup>4</sup> Institute for Imaging & Analytical Technologies, Mississippi State University, Mississippi State, MS 39762, USA

### ***Analysis methods***

#### ***SEM, SEM-EDX and TEM analyses***

SEM analysis of lignite and ZVI-LXs was operated at 5 kV. SEM-EDX probes the surface region elemental compositions of C, O, Ca, Mg, Si, Fe, Cu, Pb, and Cd in lignite and ZVI-LXs before and after metal sorption.

The samples were vortexed in ethanol for ~2 min and then dried in vacuum prior to the TEM analysis. TEM images of ZVI-LXs will be accessed for determination of particle size and shape of ZVI-LXs.

**Table S1.** Kinetic parameters from fitting aqueous  $\text{Cd}^{2+}$ ,  $\text{Cu}^{2+}$ , and  $\text{Pb}^{2+}$  sorption versus time data over ZVI-L1000 to the pseudo-first-order and pseudo-second-order kinetic models (0.05 g adsorbent dose, 100 mg/L  $\text{Cd}^{2+}$ /  $\text{Cu}^{2+}$ /  $\text{Pb}^{2+}$  solution, 25 mL solution volume, pH values 6.4 ( $\text{Cd}^{2+}$ ), 6.2 ( $\text{Cu}^{2+}$ ), and 5.4 ( $\text{Pb}^{2+}$ ) and at 25 °C, 5 min-1 h)

| Kinetic model       | Kinetic parameters          | Values    |                   |                    |       | Ref.                 |
|---------------------|-----------------------------|-----------|-------------------|--------------------|-------|----------------------|
|                     |                             | $k_1/k_2$ | $q_e(\text{exp})$ | $q_e(\text{calc})$ | $R^2$ |                      |
| Pseudo-first-order  | ZVI-L1000+ $\text{Cd}^{2+}$ | 0.012     | 10.2              | 1.2                | 0.889 | (Toor and Jin, 2012) |
|                     | ZVI-L1000+ $\text{Cu}^{2+}$ | 0.003     | 19.3              | 0.9                | 0.108 |                      |
|                     | ZVI-L1000+ $\text{Pb}^{2+}$ | 0.004     | 22.5              | 1.6                | 0.14  |                      |
| Pseudo-second-order | ZVI-L1000+ $\text{Cd}^{2+}$ | 0.16      | 10.2              | 10.4               | 0.999 | (Ho and McKay, 1999) |
|                     | ZVI-L1000+ $\text{Cu}^{2+}$ | 0.53      | 19.3              | 18.8               | 0.999 |                      |
|                     | ZVI-L1000+ $\text{Pb}^{2+}$ | 0.12      | 22.5              | 21.5               | 0.997 |                      |

$q_e$  (mg/g) Equilibrium adsorbate capacity (mg/g)

$q_t$  (mg/g) - Adsorbate capacity at time t (mg/g)

$k_1$ -First order rate constant ( $\text{min}^{-1}$ )

$k_2$ -Second order rate constant ( $\text{min}^{-1}$ )

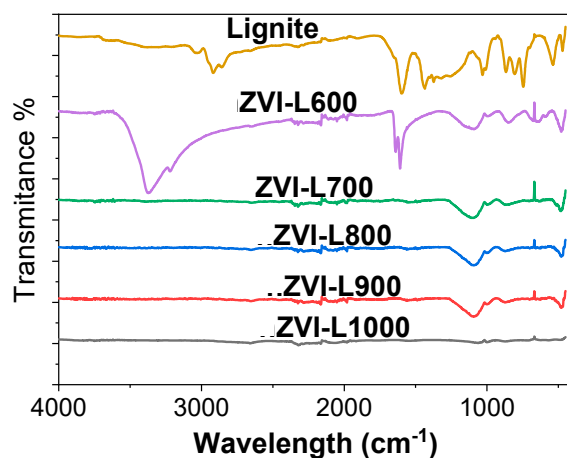

**Figure S1.** FTIR analysis of different ZVI-LXs synthesized at 600-1000 °C vs lignite.

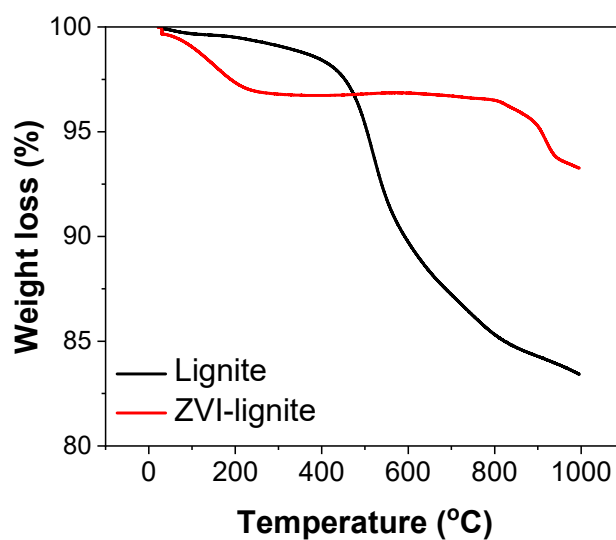

**Figure S2.** TGA profiles of lignite and ZVI-L1000 under nitrogen (N<sub>2</sub> flow rate of 50 °C/min)

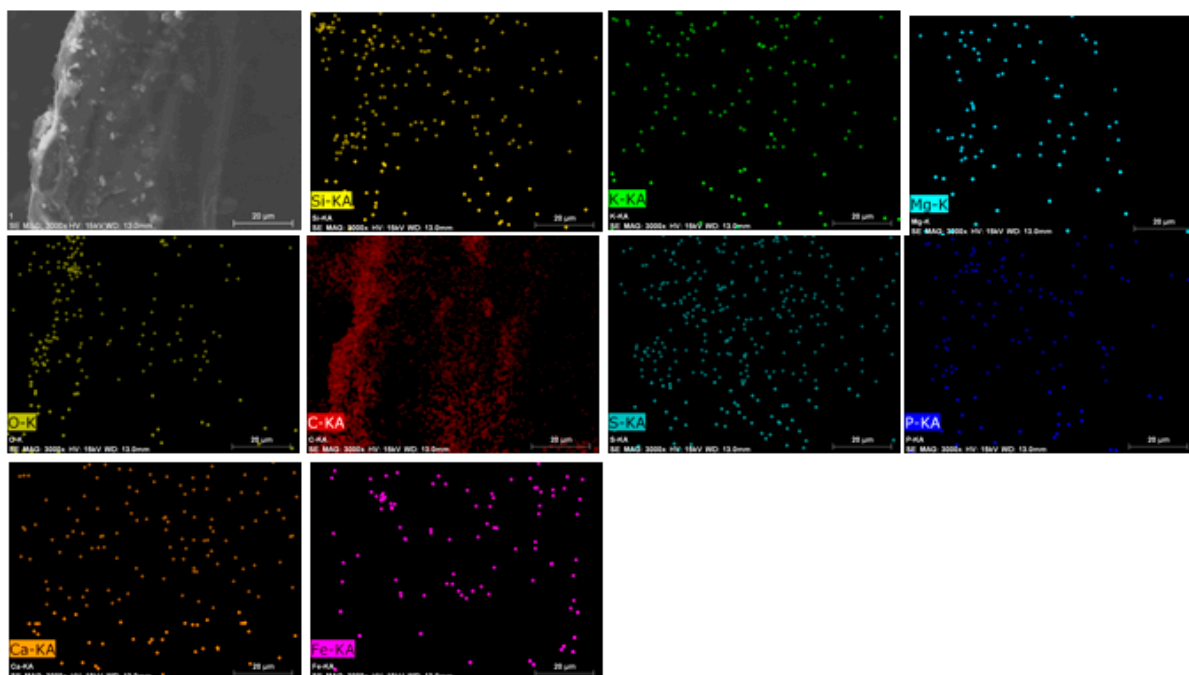

**Figure S3.** SEM image and their corresponding EDX mapping spectra of lignite.

| a Lignite |         | a ZVI-L700 |         | b ZVI-L1000 |         |
|-----------|---------|------------|---------|-------------|---------|
| Element   | Atomic% | Element    | Atomic% | Element     | Atomic% |
| C K       | 93.34   | C K        | 82.31   | C K         | 73.69   |
| Fe K      | 0.03    | Fe K       | 4.60    | Fe K        | 24.92   |
| O K       | 6.47    | O K        | 8.81    | O K         | 0.94    |
| S K       | 0.10    | S K        | 0.43    | S K         | 0.22    |
| Cl K      | 0.00    | Cl K       | 0.86    | Cl K        | 0.00    |

**Figure S4.** Comparison of elemental distribution for lignite, ZVI-L700, and ZVI-L1000.

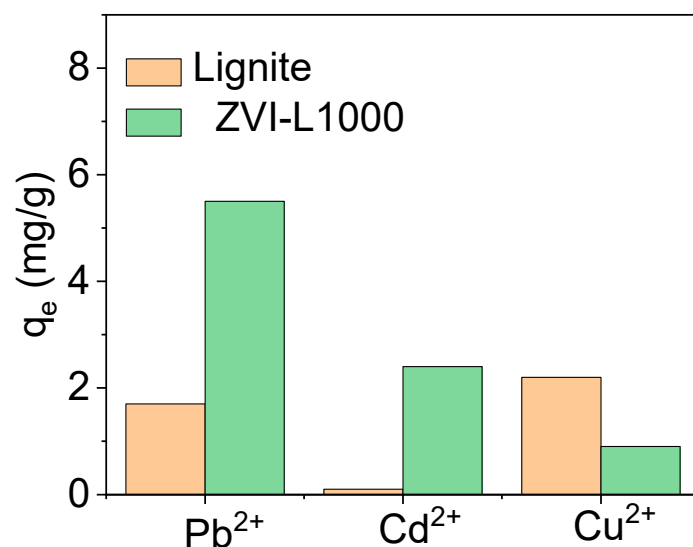

**Figure S5.** Simultaneous removal of Pb<sup>2+</sup>, Cu<sup>2+</sup>, and Cd<sup>2+</sup> (400 ppm each) by lignite and ZVI-L1000 at pH 5 (solution volume 25 mL, 25 °C, 15 min).

## References

- Cheng, P., Hu, Y.H., 2016. Dubinin-Astakhov model for acetylene adsorption on metal-organic frameworks. *Appl. Surf. Sci.* 377, 349–354. <https://doi.org/10.1016/j.apsusc.2016.03.124>
- Ho, Y.S., McKay, G., 1999. Pseudo-second order model for sorption processes. *Process Biochem.* 34, 451–465. [https://doi.org/10.1016/S0032-9592\(98\)00112-5](https://doi.org/10.1016/S0032-9592(98)00112-5)
- Toor, M., Jin, B., 2012. Adsorption characteristics, isotherm, kinetics, and diffusion of modified natural bentonite for removing diazo dye. *Chem. Eng. J.* 187, 79–88. <https://doi.org/10.1016/j.cej.2012.01.089>
- Voogd, P., Scholten, J.J.F., van Bekkum, H., 1991. Use of the t-plot—De Boer method in pore volume determinations of ZSM-5 type zeolites. *Colloids Surf.* 55, 163–171. [https://doi.org/10.1016/0166-6622\(91\)80090-B](https://doi.org/10.1016/0166-6622(91)80090-B)
